# Supplementary material for: Formation of lattice-dislocated bismuth nanowires on copper foam for enhanced electrocatalytic CO2 reduction at low overpotential
Source: Royal Society of Chemistry journal article supplement (doi:10.1039/c9ee00018f), 2019-01-01
Supplement: c9ee00018f1.pdf [file c9ee00018f1.pdf]

## Formation of Lattice-dislocated Bismuth Nanowires on Copper Foam for Enhanced Electrocatalytic CO<sub>2</sub> Reduction at Low Overpotential

Xiaolong Zhang,<sup>a</sup> Xinghuan Sun,<sup>a</sup> Si-Xuan Guo,<sup>a,b</sup> Alan M. Bond,<sup>a,b</sup> Jie Zhang<sup>a,b\*</sup>

<sup>a</sup>School of Chemistry, Monash University, Clayton 3800, Victoria, Australia.

<sup>b</sup>ARC Centre of Excellence for Electromaterials Science, Monash University, Clayton 3800, Victoria, Australia.

\*Email: [jie.zhang@monash.edu](mailto:jie.zhang@monash.edu)

### Electronic Supporting Information

#### Preparation of H<sub>2</sub> and CO calibration curves.

The calibration curves of H<sub>2</sub> and CO were prepared as follows:

1. A known amount ( $n$  mol,  $n = 1.00 \times 10^{-5}$ ,  $2.00 \times 10^{-5}$ ,  $3.00 \times 10^{-5}$ ,  $4.00 \times 10^{-5}$ , and  $5.00 \times 10^{-5}$  mol) of CO or H<sub>2</sub> standard gas was injected into the same H cell used for bulk electrolysis with the same electrolyte solution volume and head space volume (the electrolyte solution was saturated with CO<sub>2</sub> and the head space is filled with pure CO<sub>2</sub>).
2. The mixed gas in the head space of the H cell was then subjected to GC test to obtain the peak area value of CO or H<sub>2</sub>.
3. Repeated experiments with different CO or H<sub>2</sub> amount were tested to obtain the calibration curves of CO and H<sub>2</sub>. The amount of the injected CO or H<sub>2</sub> were plotted as a function of the corresponding peak area in GC. Calibration curves were obtained by linear fitting of the as-obtained data points (Figure S16).

The equation used to calculate FE of CO and H<sub>2</sub> is  $FE = (2 \cdot F \cdot a \cdot A) / C \cdot 100\%$ , where 2 is the number of electrons required per molecule to obtain CO or H<sub>2</sub>,  $F$  is the Faraday constant,  $a$  is the slope value obtained from the calibration curves of CO or H<sub>2</sub>,  $A$  is the peak area of CO or H<sub>2</sub> obtained from GC, and  $C$  is the total charges consumed during bulk electrolysis.

#### Calculation of overpotential

The equation used to calculate the overpotential of CO<sub>2</sub> reduction to formate is  $\eta = |E - E^0|$ , where  $\eta$  is the overpotential,  $E$  is the actually applied potential, and  $E^0$  is the equilibrium potential for CO<sub>2</sub> reduction to formate. An  $E^0$  value of -0.09 V vs. RHE in a CO<sub>2</sub> saturated 0.5 M NaHCO<sub>3</sub> solution was estimated by us taking into account the pH dependent nature of carbonaceous and formate species (10.1016/j.nanoen.2016.11.004, supporting information). In this work, this  $E^0$

value was used for the calculation of overpotential. However, no IR calibration was applied to all the potential values reported in this work.

## Figures and Tables

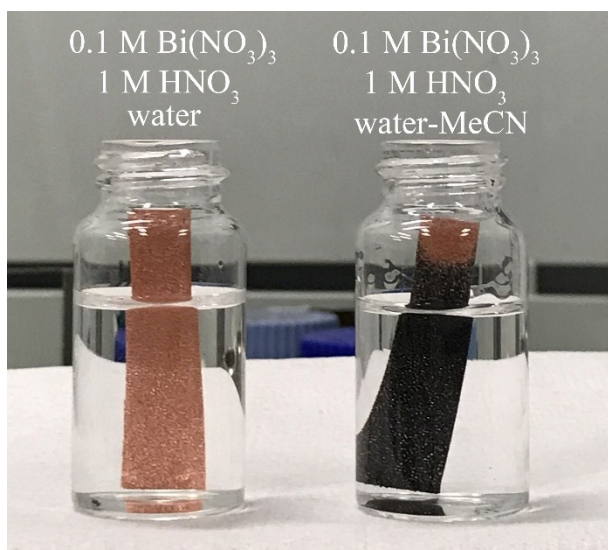

**Figure S1.** Photograph showing copper foams immersed in aqueous solutions containing 0.1 M  $\text{Bi}(\text{NO}_3)_3$  and 1 M  $\text{HNO}_3$  in the absence (left) and presence (right) of 50% MeCN for 5 seconds.

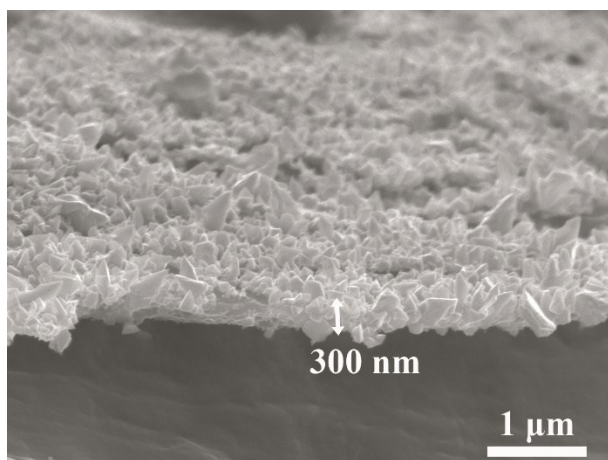

**Figure S2.** Cross-section view of the Bi layer coated on to copper foam.

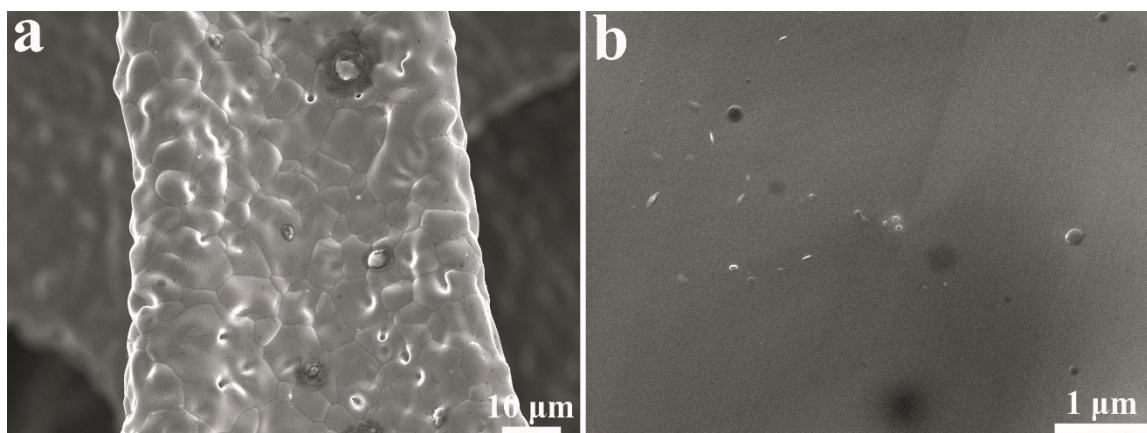

**Figure S3.** SEM images of a bare copper foam.

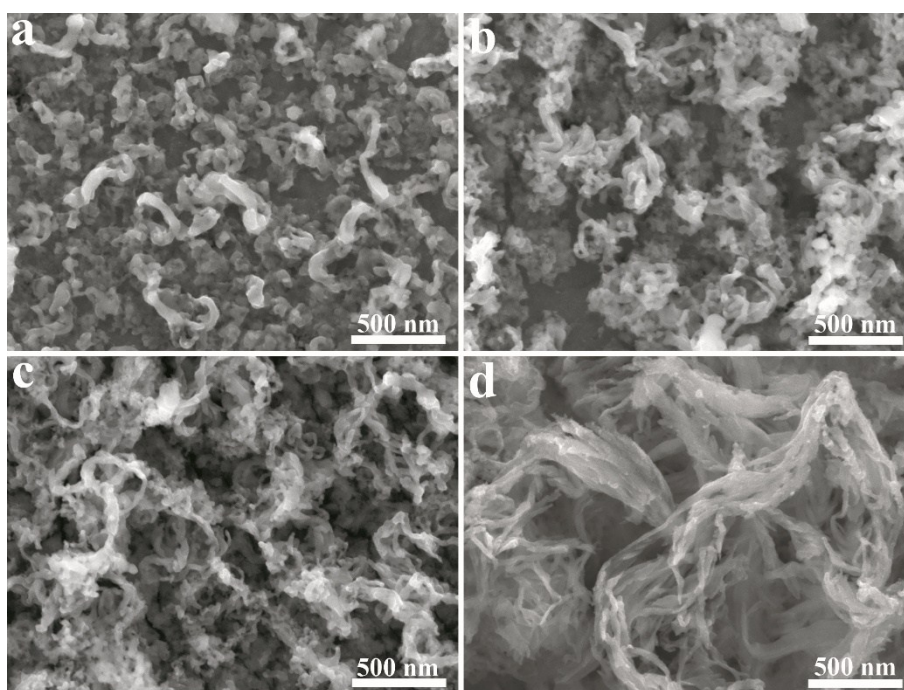

**Figure S4.** SEM images of Cu foam@Bi<sub>2</sub>O<sub>3</sub> treated at -0.99 V for half hour and then treated at -0.69 V for (a) 0.5 h, (b) 1 h, (c) 2h, and (d) 4 h in a CO<sub>2</sub> saturated 0.5 M NaHCO<sub>3</sub> solution.

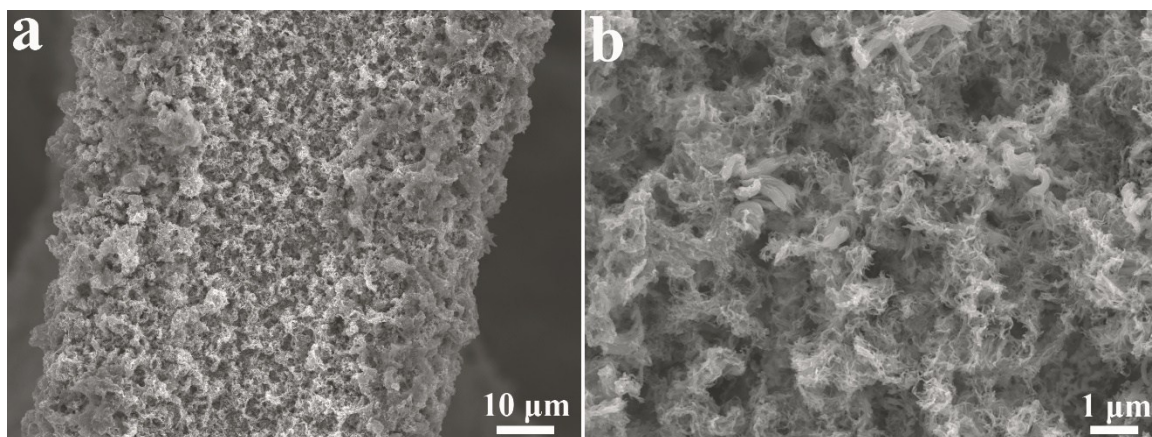

**Figure S5.** Low magnification SEM images of Cu foam@BNW.

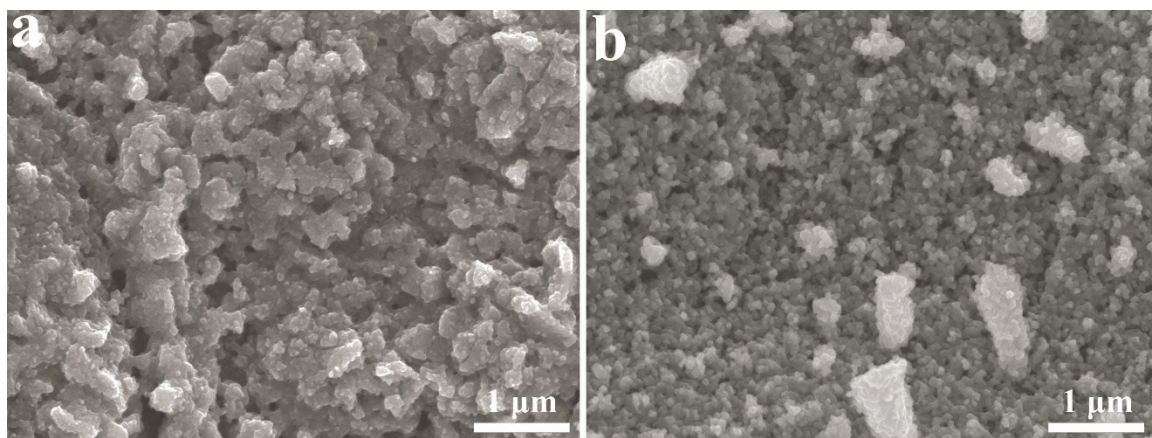

**Figure S6.** SEM images of Cu foam@Bi<sub>2</sub>O<sub>3</sub> treated at (a) -0.99 V for half an hour and (b) -0.69 V for 4 hours in a CO<sub>2</sub> saturated 0.5 M NaHCO<sub>3</sub> solution.



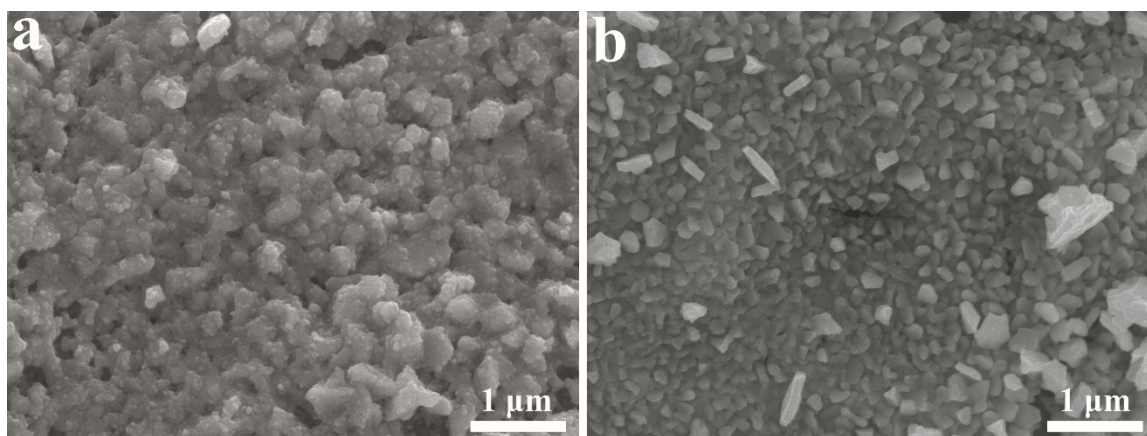

**Figure S7.** SEM images of (a) Bi plate@Bi<sub>2</sub>O<sub>3</sub> treated at -0.99 V for half an hour and -0.69 V for 4 hours in a 0.5 M NaHCO<sub>3</sub> solution; (b) Cu foam@Bi<sub>2</sub>O<sub>3</sub> treated at -0.99 V for half an hour and -0.69 V for 4 hours in a 0.5 M NaCl solution.

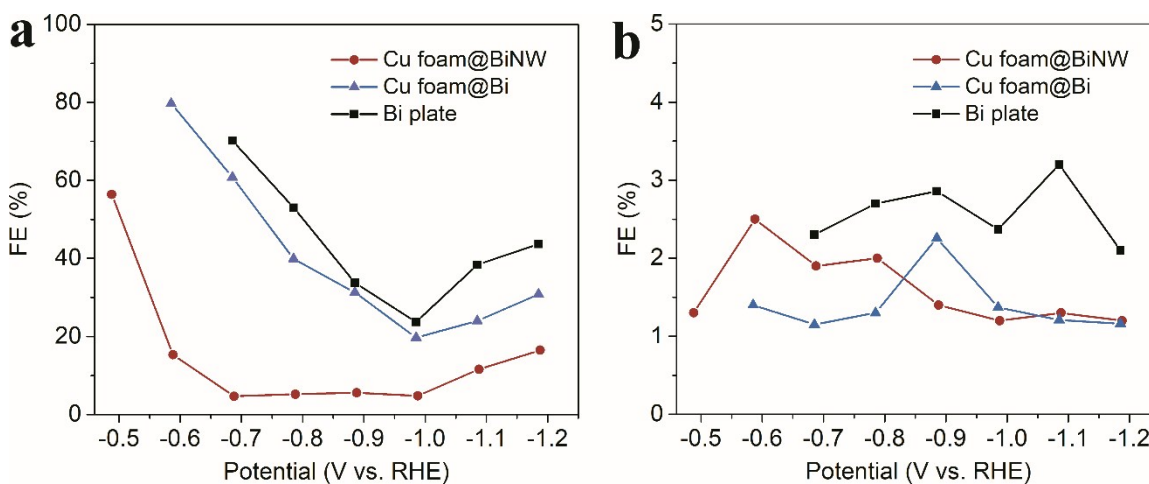

**Figure S8.** Faradaic efficiency distributions of (a) H<sub>2</sub> and (b) CO on Bi plate, Cu foam@Bi, and Cu foam@BiNW.

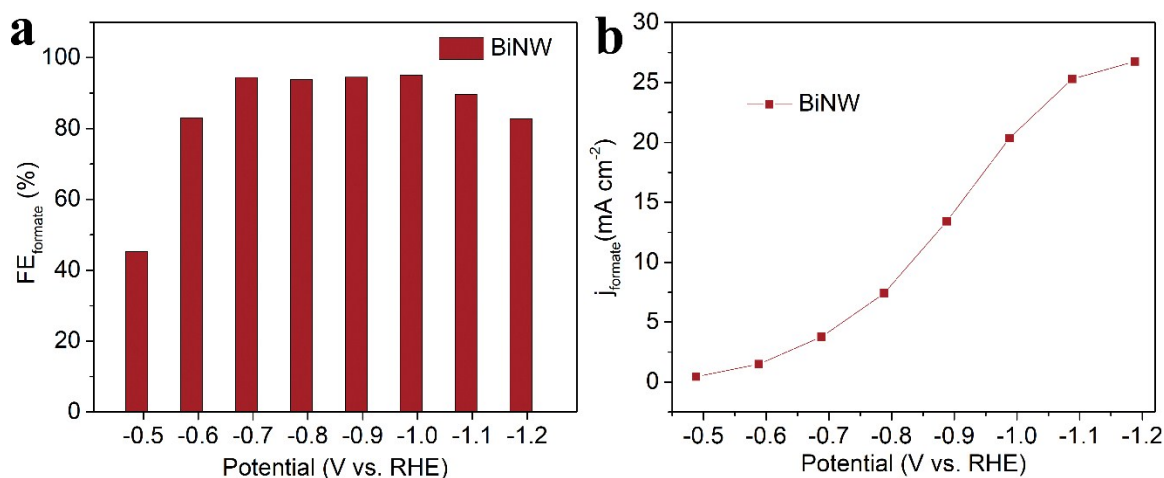

**Figure S9.** Bulk electrolysis results of the free standing BiNW peeled off from the Cu foam@BiNW electrode. The electrode substrate is a glassy carbon plate. (a) Faradaic efficiencies and (b) partial current densities for formate plotted as a function of applied potential.

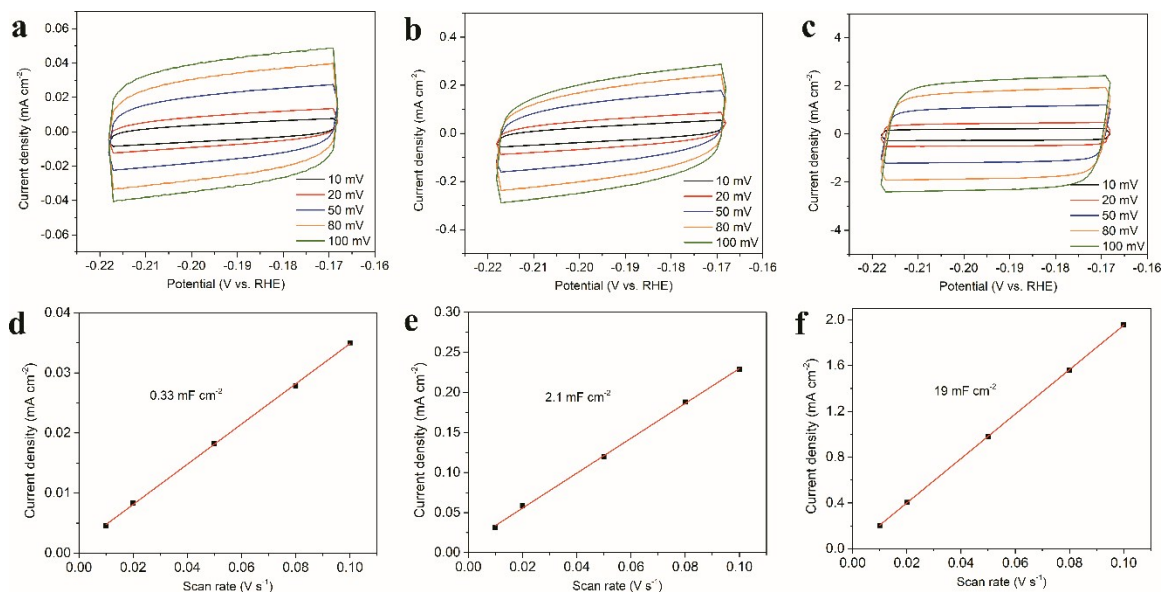

**Figure S10.** Double layer capacitance ( $C_{\text{dl}}$ ) obtained from cyclic voltammogram (CV) measurements. CV curves of Bi plate (a), Cu foam@Bi (b) and Cu foam@BiNW (c) in  $\text{CO}_2$  saturated 0.5 M  $\text{NaHCO}_3$  electrolyte between -0.218 V and -0.168 V vs. RHE. (d,e,f) The corresponding half of the charging current density difference plotted against scan rate. The linear slope is equivalent to the  $C_{\text{dl}}$ .

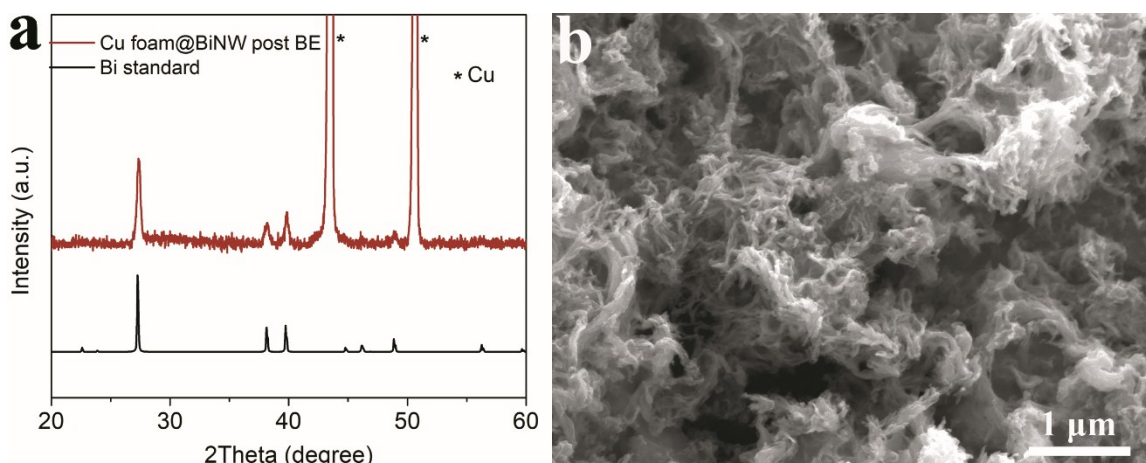

**Figure S11.** (a) XRD pattern and (b) SEM image of Cu foam@BNW obtained after long-term bulk electrolysis.

**Table S1.** List of  $j_{\text{formate}}$  at -0.69 V vs.RHE, measured double layer capacitance, and  $j_{\text{formate}}'$  per ECSA of the Bi plate, Cu foam@Bi and Cu foam@BiNW.

| Sample name  | $j_{\text{formate}}$ at -0.69 V vs.RHE (mA cm <sup>-2</sup> ) | $C_{\text{dl}}$ (mF cm <sup>-2</sup> ) | $j_{\text{formate}}'$ at -0.69 V vs. RHE per ECSA (mA cm <sup>-2</sup> ) |
|--------------|---------------------------------------------------------------|----------------------------------------|--------------------------------------------------------------------------|
| Bi plate     | 0.13                                                          | 0.33                                   | $0.39 \cdot \alpha$                                                      |
| Cu foam@Bi   | 0.77                                                          | 2.1                                    | $0.37 \cdot \alpha$                                                      |
| Cu foam@BiNW | 14.9                                                          | 19                                     | $0.78 \cdot \alpha$                                                      |

\*  $j_{\text{formate}}'$  is calculated according to the following equation:  $j_{\text{formate}}' = j_{\text{formate}} / C_{\text{dl}} \cdot \alpha$ . Where  $\alpha$  (mF cm<sup>-2</sup>) represents the specific capacitance of bismuth.

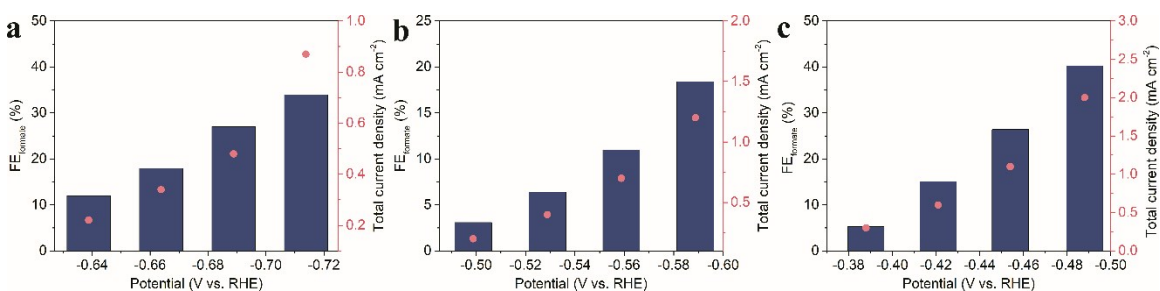

**Figure S12.** Extra bulk electrolysis results obtained on (a) Bi plate, (b) Cu foam@Bi and (c) Cu foam@BiNW in the low overpotential range where the reaction rate is kinetically controlled.

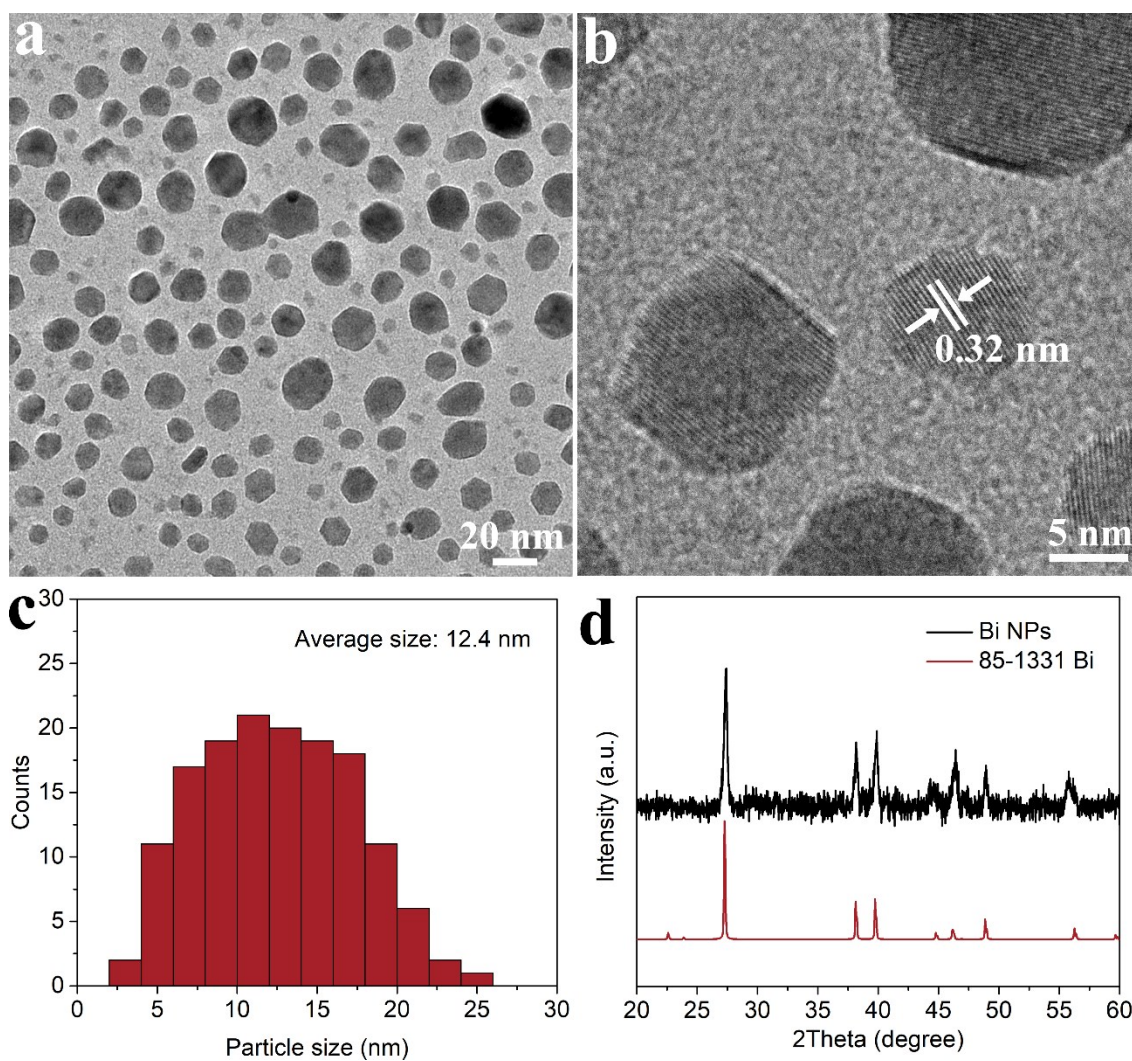

**Figure S13.** (a) TEM image, (b) HRTEM image, (c) particle size distribution, and (d) XRD pattern of the as-synthesized BiNPs with exposed (012) planes.



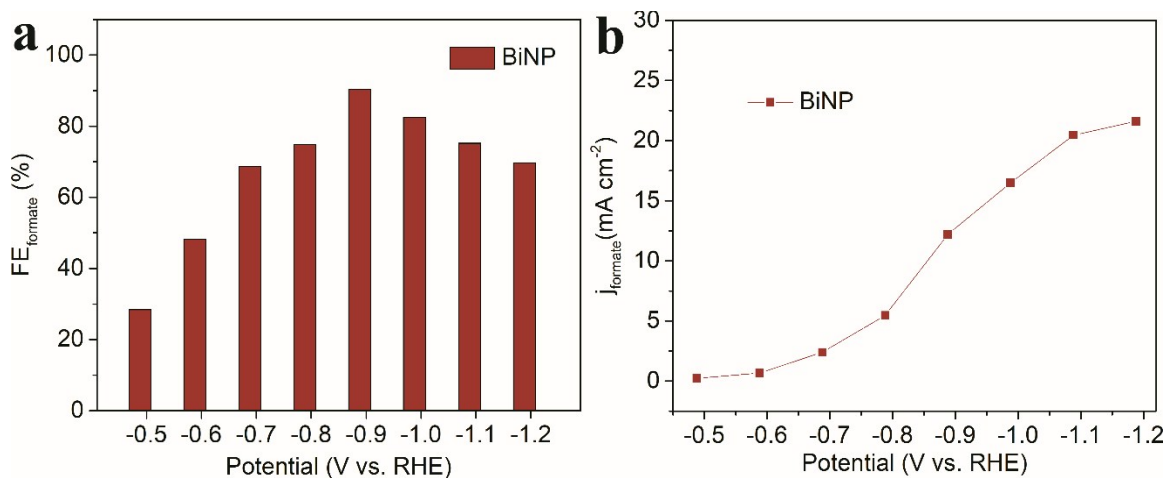

**Figure S14.** Bulk electrolysis results of the BiNPs. The electrode substrate is a glassy carbon plate. (a) Faradaic efficiencies and (b) partial current densities for formate plotted as a function of applied potential.

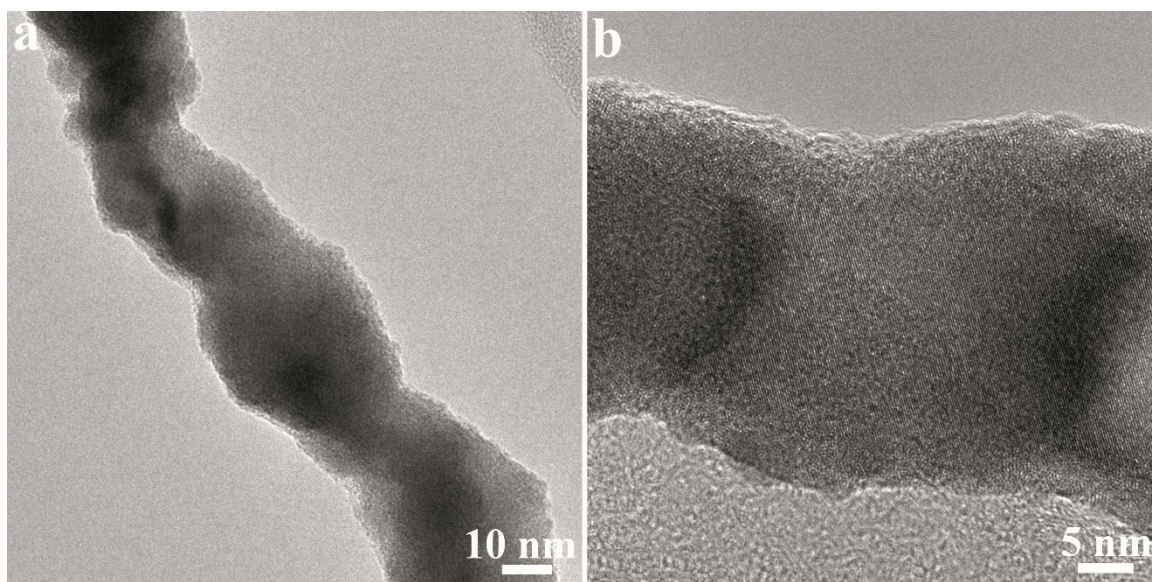

**Figure S15.** TEM images of a BiNW peeled off from a Cu foam@BNW electrode after long-term bulk electrolysis.

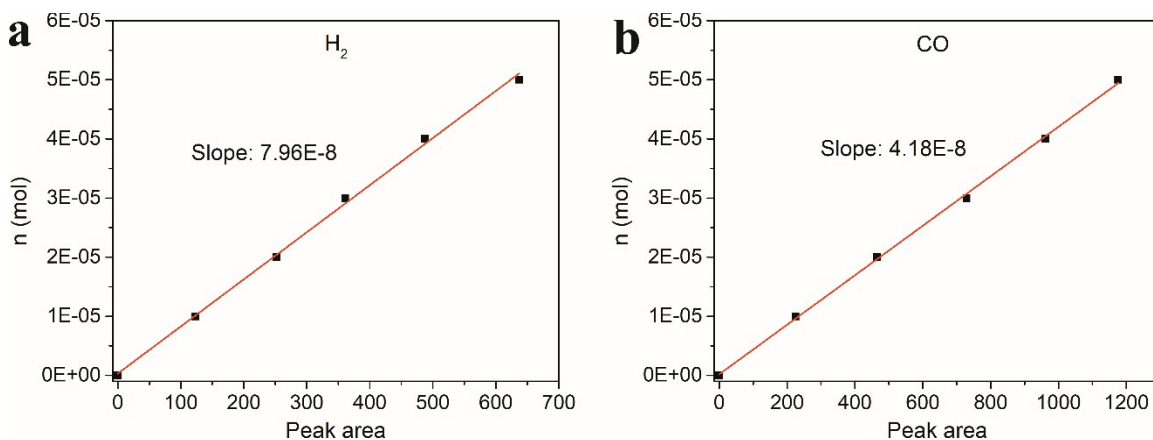

**Figure S16.** Calibration curves of (a) H<sub>2</sub> and (b) CO.

**Table S2.** Comparison of the electrocatalytic activity of the Cu foam@BiNW electrode with other state-of-the-art bismuth-based catalysts for electrocatalytic CO<sub>2</sub> reduction to formate in aqueous media.

| Electrocatalysts                      | Applied potential at maximum FE (V vs. RHE) | Maximum FE (%) | References |
|---------------------------------------|---------------------------------------------|----------------|------------|
| Bi dendrite                           | -0.74                                       | 89             | S1         |
| BiO <sub>x</sub> /C                   | -1.11                                       | 93.4           | S2         |
| BiNS                                  | -0.86                                       | 95             | S3         |
| Bi <sub>2</sub> O <sub>3</sub> -NGQDs | -0.89                                       | 98.1           | S4         |
|                                       | -1.19                                       | 90.8           |            |
| Bi-BiOC                               | -0.70                                       | 85             | S5         |
| Cu foam@BiNW                          | -0.69                                       | 95             | This work  |
|                                       | -0.99                                       | 94             |            |

## References

- S1. J. H. Koh, D. H. Won, T. Eom, N.-K. Kim, K. D. Jung, H. Kim, Y. J. Hwang and B. K. Min, *ACS Catal.*, 2017, **7**, 5071-5077.
- S2. C. W. Lee, J. S. Hong, K. D. Yang, K. Jin, J. H. Lee, H.-Y. Ahn, H. Seo, N.-E. Sung and K. T. Nam, *ACS Catal.*, 2018, **8**, 931-937.
- S3. N. Han, Y. Wang, H. Yang, J. Deng, J. Wu, Y. Li and Y. Li, *Nat. Commun.*, 2018, **9**, 1320.
- S4. Z. Chen, K. Mou, X. Wang and L. Liu, *Angew. Chem. Int. Ed.*, 2018, **57**, 12790-12794.
- S5. J. Zhang, Y. Zhang, X. Zhang, Y. Ling, F. Li and A. Bond, *Angew. Chem. Int. Ed.*, 2018, **57**, 13283-13287.
